# Supplementary material for: Label-Free Comparative Proteomics of Differentially Expressed Mycobacterium tuberculosis Protein in Rifampicin-Related Drug-Resistant Strains
Source: MDPI journal article supplement (doi:10.3390/pathogens10050607), 2021-05-15
Supplement: s1 [file s1]

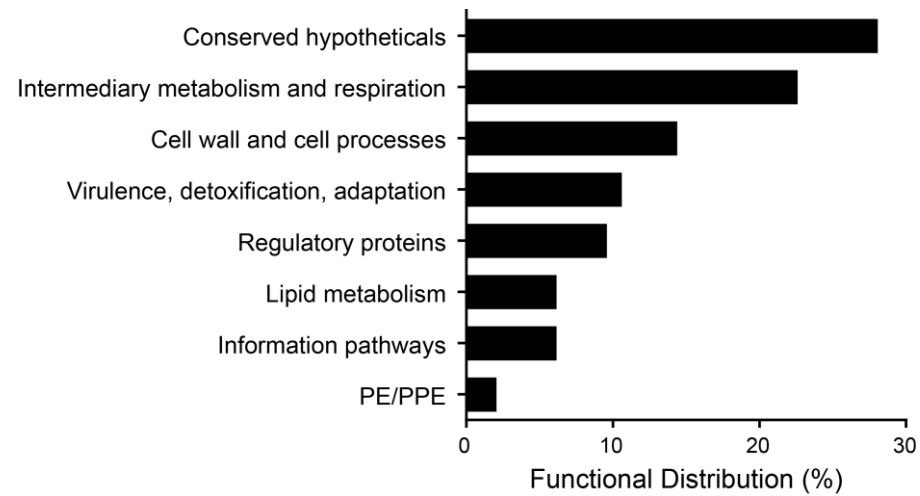

**Figure S1.** Functional distribution of the unexpressed proteins in both MDR and XDR strains, when compared to the RR strain, according to the TubercuList Functional Category (<http://svitsrv8.epfl.ch/tuberculist/>). RR, rifampin-resistant; MDR, Multidrug-resistant; XDR, extensively drug-resistant.

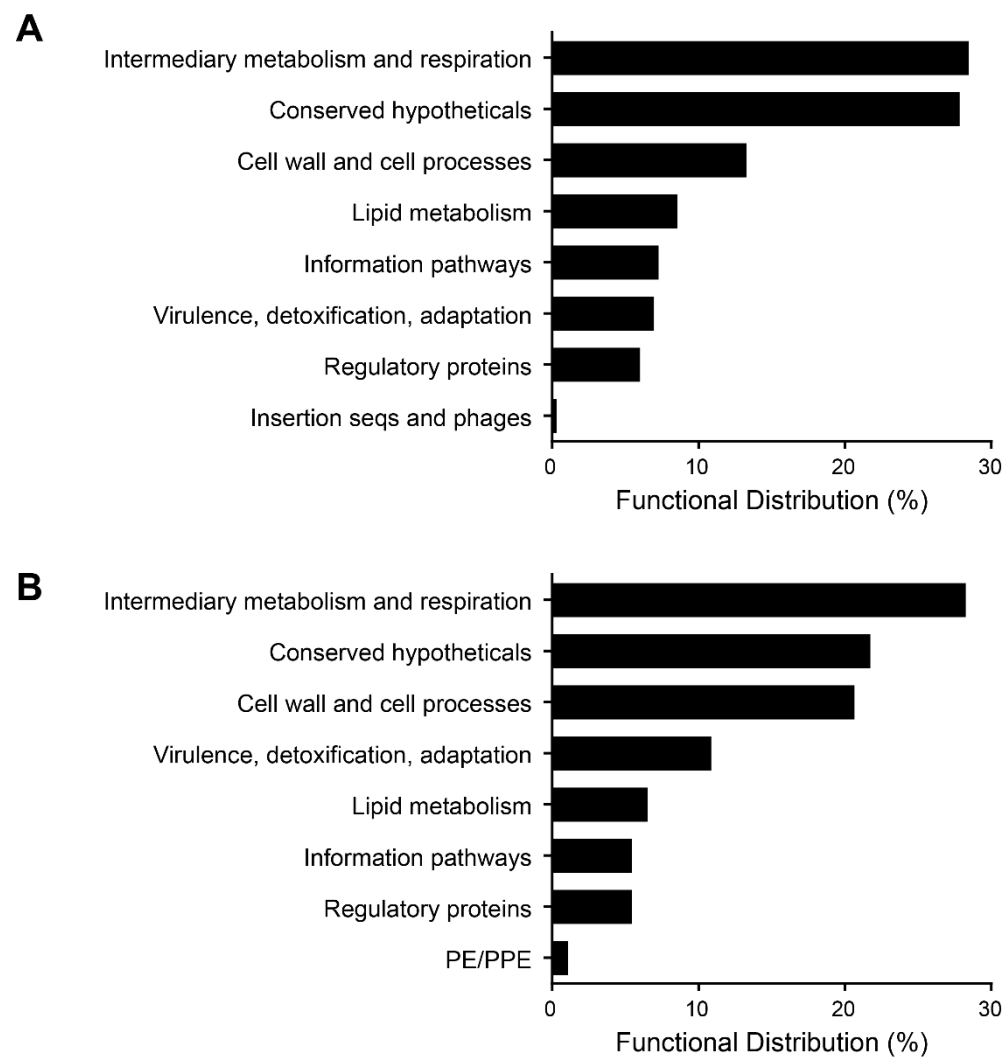

**Figure S2.** Functional distribution of the specially expressed proteins in either the XDR (**A**) or MDR (**B**) strains, according to the TubercuList Functional Category (<http://svitsrv8.epfl.ch/tuberculist/>). MDR, Multidrug-resistant; XDR, extensively drug-resistant.



**Table S1.** The DST patterns of the RR-TB, MDR-TB and XDR-TB clinical isolates.

| Drugs | Concentrations (mg/L) | RR-TB | MDR-TB | XDR-TB |
|-------|-----------------------|-------|--------|--------|
| RIF   | 40.0                  | R     | R      | R      |
| INH   | 0.2                   | S     | R      | R      |
| EMB   | 2.0                   | S     | S      | R      |
| LFX   | 2.0                   | S     | S      | R      |
| MOX   | 2.0                   | S     | S      | R      |
| KAN   | 30.0                  | S     | S      | R      |

**Table S2.** Biological Process enrichment in the PPI network of the up-regulated proteins of DR strains and other predicted functional partners.

| #term ID   | Description                                         | Observed Gene Count | Background Gene Count | FDR      | Matching Proteins                                                                                                                                             |
|------------|-----------------------------------------------------|---------------------|-----------------------|----------|---------------------------------------------------------------------------------------------------------------------------------------------------------------|
| GO:0042364 | water-soluble vitamin biosynthetic process          | 11                  | 44                    | 9.43E-07 | Rv1417,cmk,folB,folK,folP1,panB,ribA1,ribA2,ribC,ribG,ribH                                                                                                    |
| GO:1901564 | organonitrogen compound metabolic process           | 31                  | 563                   | 9.43E-07 | Rv1417,Rv2851c,ackA,acs,cmk,dop,folB,folE,folK,folP1,folP2,glmU,mpa,mtrA,mtrB,pafA,panB,prcA,prcB,pta,pup,pykA,ribA1,ribA2,ribC,ribG,ribH,rplA,rplJ,rplL,rplM |
| GO:0010498 | proteasomal protein catabolic process               | 6                   | 6                     | 1.79E-06 | dop,mpa,pafA,prcA,prcB,pup                                                                                                                                    |
| GO:0019941 | modification-dependent protein catabolic process    | 6                   | 6                     | 1.79E-06 | dop,mpa,pafA,prcA,prcB,pup                                                                                                                                    |
| GO:0006771 | riboflavin metabolic process                        | 6                   | 7                     | 2.19E-06 | Rv1417,ribA1,ribA2,ribC,ribG,ribH                                                                                                                             |
| GO:0009231 | riboflavin biosynthetic process                     | 6                   | 7                     | 2.19E-06 | Rv1417,ribA1,ribA2,ribC,ribG,ribH                                                                                                                             |
| GO:0043604 | amide biosynthetic process                          | 14                  | 130                   | 5.66E-06 | ackA,acs,cmk,folB,folE,folK,folP1,folP2,panB,pta,rplA,rplJ,rplL,rplM                                                                                          |
| GO:0042398 | cellular modified amino acid biosynthetic process   | 7                   | 21                    | 1.10E-05 | cmk,folB,folE,folK,folP1,folP2,panB                                                                                                                           |
| GO:0017144 | drug metabolic process                              | 14                  | 144                   | 1.50E-05 | Rv1417,acs,folB,folE,folK,folP1,mutA,mutB,pykA,ribA1,ribA2,ribC,ribG,ribH                                                                                     |
| GO:0009108 | coenzyme biosynthetic process                       | 11                  | 88                    | 2.62E-05 | ackA,acs,cmk,folB,folE,folK,folP1,folP2,panB,pta,pykA                                                                                                         |
| GO:0009396 | folic acid-containing compound biosynthetic process | 5                   | 7                     | 2.62E-05 | folB,folE,folK,folP1,folP2                                                                                                                                    |
| GO:0006575 | cellular modified amino acid metabolic process      | 7                   | 27                    | 3.52E-05 | cmk,folB,folE,folK,folP1,folP2,panB                                                                                                                           |
| GO:1901566 | organonitrogen compound biosynthetic process        | 22                  | 401                   | 5.71E-05 | Rv1417,ackA,acs,cmk,folB,folE,folK,folP1,folP2,glmU,panB,pta,pykA,ribA1,ribA2,ribC,ribG,ribH,rplA,rplJ,rplL,rplM                                              |
| GO:0044271 | cellular nitrogen compound biosynthetic process     | 23                  | 443                   | 7.53E-05 | Rv1417,ackA,acs,cmk,folB,folE,folK,folP1,folP2,glmU,mtrA,panB,pta,pykA,ribA1,ribA2,ribC,ribG,ribH,rplA,rplJ,rplL,rplM                                         |
| GO:0006760 | folic acid-containing compound metabolic process    | 5                   | 11                    | 0.00011  | folB,folE,folK,folP1,folP2                                                                                                                                    |
| GO:0046654 | tetrahydrofolate biosynthetic process               | 4                   | 6                     | 0.00029  | folB,folE,folK,folP1                                                                                                                                          |
| GO:0040007 | growth                                              | 24                  | 541                   | 0.00046  | Rv1711,Rv3371,cmk,engA,folB,folE,folP1,ftsZ,glmU,lpqB,lpqW,mtrA,mtrB,panB,prcA,prcB,pup,pykA,ribA2,ribG,ribH,rplJ,rplL,rplM                                   |

|            |                                                     |    |      |         |                                                                                                                                                                                                                            |
|------------|-----------------------------------------------------|----|------|---------|----------------------------------------------------------------------------------------------------------------------------------------------------------------------------------------------------------------------------|
| GO:0044267 | cellular protein metabolic process                  | 13 | 181  | 0.00047 | Rv2851c,dop,mpa,mtrA,mtrB,pafA,prcA,prcB,pup,rplA,rplJ,rplL,rplM                                                                                                                                                           |
| GO:0006807 | nitrogen compound metabolic process                 | 32 | 900  | 0.001   | Rv1417,Rv1711,Rv2851c,ackA,acs,cmk,dop,folB,folE,folK,folP1,folP2,glmU,mpa,mtrA,mtrB,pafA,p<br>anB,prcA,prcB,pta,pup,pykA,ribA1,ribA2,ribC,ribG,ribH,rplA,rplJ,rplL,rplM                                                   |
| GO:0018130 | heterocycle biosynthetic process                    | 18 | 355  | 0.001   | Rv1417,ackA,acs,cmk,folB,folE,folK,folP1,folP2,glmU,mtrA,pta,pykA,ribA1,ribA2,ribC,ribG,ribH                                                                                                                               |
| GO:0046653 | tetrahydrofolate metabolic process                  | 4  | 10   | 0.001   | folB,folE,folK,folP1                                                                                                                                                                                                       |
| GO:0009987 | cellular process                                    | 40 | 1278 | 0.0011  | Rv1417,Rv1711,Rv2851c,Rv3371,ackA,acs,bpa,cmk,dop,fadD21,folB,folE,folK,folP1,folP2,ftsZ,glm<br>U,lpqW,mpa,mtrA,mtrB,mutA,mutB,pafA,panB,prcA,prcB,pta,pup,pykA,ribA1,ribA2,ribC,ribG,ri<br>bH,rplA,rplJ,rplL,rplM,sepF    |
| GO:0006084 | acetyl-CoA metabolic process                        | 3  | 3    | 0.0012  | ackA,acs,pta                                                                                                                                                                                                               |
| GO:0006085 | acetyl-CoA biosynthetic process                     | 3  | 3    | 0.0012  | ackA,acs,pta                                                                                                                                                                                                               |
| GO:0071704 | organic substance metabolic process                 | 38 | 1203 | 0.0015  | Rv1417,Rv1711,Rv2851c,Rv3371,ackA,acs,chn2,cmk,dop,fadD21,folB,folE,folK,folP1,folP2,glmU,lp<br>qW,mpa,mtrA,mtrB,mutA,mutB,pafA,panB,prcA,prcB,pta,pup,pykA,ribA1,ribA2,ribC,ribG,ribH,r<br>plA,rplJ,rplL,rplM             |
| GO:0046655 | folic acid metabolic process                        | 3  | 4    | 0.0019  | folB,folK,folP1                                                                                                                                                                                                            |
| GO:0046656 | folic acid biosynthetic process                     | 3  | 4    | 0.0019  | folB,folK,folP1                                                                                                                                                                                                            |
| GO:0070490 | protein pupylation                                  | 3  | 4    | 0.0019  | dop,pafA,pup                                                                                                                                                                                                               |
| GO:0044237 | cellular metabolic process                          | 37 | 1182 | 0.0021  | Rv1417,Rv1711,Rv2851c,Rv3371,ackA,acs,cmk,dop,fadD21,folB,folE,folK,folP1,folP2,glmU,lpqW,<br>mpa,mtrA,mtrB,mutA,mutB,pafA,panB,prcA,prcB,pta,pup,pykA,ribA1,ribA2,ribC,ribG,ribH,rplA<br>,rplJ,rplL,rplM                  |
| GO:0044283 | small molecule biosynthetic process                 | 15 | 284  | 0.0021  | Rv1417,cmk,fadD21,folB,folE,folK,folP1,folP2,panB,pykA,ribA1,ribA2,ribC,ribG,ribH                                                                                                                                          |
| GO:1901362 | organic cyclic compound biosynthetic process        | 18 | 388  | 0.0021  | Rv1417,ackA,acs,cmk,folB,folE,folK,folP1,folP2,glmU,mtrA,pta,pykA,ribA1,ribA2,ribC,ribG,ribH                                                                                                                               |
| GO:0044281 | small molecule metabolic process                    | 22 | 552  | 0.003   | Rv1417,Rv3371,ackA,acs,cmk,fadD21,folB,folE,folK,folP1,folP2,glmU,mutA,mutB,panB,pta,pykA,r<br>ibA1,ribA2,ribC,ribG,ribH                                                                                                   |
| GO:0043412 | macromolecule modification                          | 8  | 101  | 0.0052  | Rv1711,Rv2851c,dop,mtrA,mtrB,pafA,pup,ribG                                                                                                                                                                                 |
| GO:0044249 | cellular biosynthetic process                       | 26 | 755  | 0.0063  | Rv1417,Rv3371,ackA,acs,cmk,fadD21,folB,folE,folK,folP1,folP2,glmU,lpqW,mtrA,panB,pta,pykA,r<br>ibA1,ribA2,ribC,ribG,ribH,rplA,rplJ,rplL,rplM                                                                               |
| GO:0008152 | metabolic process                                   | 40 | 1416 | 0.0072  | Rv1417,Rv1543,Rv1711,Rv2851c,Rv3371,ackA,acs,chn2,cmk,dop,fadD21,folB,folE,folK,folP1,folP2,<br>glmU,lpqW,mpa,mtrA,mtrB,mutA,mutB,pafA,panB,prcA,prcB,pta,pup,pykA,ribA1,ribA2,ribC,rib<br>G,ribH,rplA,rplJ,rplL,rplM,yfiH |
| GO:1901576 | organic substance biosynthetic process              | 26 | 767  | 0.0077  | Rv1417,Rv3371,ackA,acs,cmk,fadD21,folB,folE,folK,folP1,folP2,glmU,lpqW,mtrA,panB,pta,pykA,r<br>ibA1,ribA2,ribC,ribG,ribH,rplA,rplJ,rplL,rplM                                                                               |
| GO:0034641 | cellular nitrogen compound metabolic process        | 24 | 686  | 0.0083  | Rv1417,Rv1711,ackA,acs,cmk,folB,folE,folK,folP1,folP2,glmU,mtrA,panB,pta,pykA,ribA1,ribA2,rib<br>C,ribG,ribH,rplA,rplJ,rplL,rplM                                                                                           |
| GO:0019678 | propionate metabolic process, methylmalonyl pathway | 2  | 2    | 0.0116  | mutA,mutB                                                                                                                                                                                                                  |
| GO:0006464 | cellular protein modification process               | 6  | 71   | 0.0154  | Rv2851c,dop,mtrA,mtrB,pafA,pup                                                                                                                                                                                             |

|            |                                        |    |     |        |                                                                                                          |
|------------|----------------------------------------|----|-----|--------|----------------------------------------------------------------------------------------------------------|
| GO:0018193 | peptidyl-amino acid modification       | 4  | 31  | 0.0203 | dop,mtrB,pafA,pup                                                                                        |
| GO:0042254 | ribosome biogenesis                    | 4  | 33  | 0.0245 | Rv1711,engA,rplA,rplJ                                                                                    |
| GO:0044085 | cellular component biogenesis          | 8  | 139 | 0.0261 | Rv1711,bpa,engA,ftsZ,glmU,rplA,rplJ,sepF                                                                 |
| GO:0071732 | cellular response to nitric oxide      | 2  | 4   | 0.0261 | mpa,pafA                                                                                                 |
| GO:0015940 | pantothenate biosynthetic process      | 2  | 5   | 0.0327 | cmk,panB                                                                                                 |
| GO:0071731 | response to nitric oxide               | 3  | 19  | 0.0348 | Rv3371,mpa,pafA                                                                                          |
| GO:0046483 | heterocycle metabolic process          | 20 | 608 | 0.0356 | Rv1417,Rv1711,ackA,acs,cmk,folB,folE,folK,folP1,folP2,glmU,mtrA,pta,pykA,ribA1,ribA2,ribC,ribG,ribH,rplA |
| GO:0043650 | dicarboxylic acid biosynthetic process | 3  | 20  | 0.0382 | folB,folK,folP1                                                                                          |
| GO:0015939 | pantothenate metabolic process         | 2  | 6   | 0.0406 | cmk,panB                                                                                                 |
| GO:0090407 | organophosphate biosynthetic process   | 8  | 159 | 0.048  | ackA,acs,cmk,folE,glmU,lpqW,pta,pykA                                                                     |
| GO:0016310 | phosphorylation                        | 6  | 97  | 0.0485 | ackA,cmk,folK,mtrA,mtrB,pykA                                                                             |
| GO:0006082 | organic acid metabolic process         | 13 | 343 | 0.05   | ackA,acs,cmk,fadD21,folB,folE,folK,folP1,folP2,mutA,mutB,panB,pykA                                       |

**Table S3.** Molecular Function enrichment in the PPI network of the up-regulated proteins of DR strains and other predicted functional partners.

| #term ID   | Description                                                                               | Observed Gene Count | Background Gene Count | FDR    | Matching Proteins                                                                                                                                                      |
|------------|-------------------------------------------------------------------------------------------|---------------------|-----------------------|--------|------------------------------------------------------------------------------------------------------------------------------------------------------------------------|
| GO:0070628 | proteasome binding                                                                        | 3                   | 3                     | 0.0141 | bpa,mpa,pup                                                                                                                                                            |
| GO:0003933 | GTP cyclohydrolase activity                                                               | 2                   | 2                     | 0.0236 | folE,ribA2                                                                                                                                                             |
| GO:0004298 | threonine-type endopeptidase activity                                                     | 2                   | 2                     | 0.0236 | prcA,prcB                                                                                                                                                              |
| GO:0004494 | methylmalonyl-CoA mutase activity                                                         | 2                   | 3                     | 0.0236 | mutA,mutB                                                                                                                                                              |
| GO:0005525 | GTP binding                                                                               | 5                   | 30                    | 0.0236 | Rv1496,engA,folE,ftsZ,ribA2                                                                                                                                            |
| GO:0008144 | drug binding                                                                              | 14                  | 331                   | 0.0236 | Rv1496,Rv2148c,Rv2850c,ackA,acs,cmk,dop,folK,mpa,mtrB,mutA,mutB,pafA,pykA                                                                                              |
| GO:0008686 | 3,4-dihydroxy-2-butanone-4-phosphate synthase activity                                    | 2                   | 2                     | 0.0236 | ribA1,ribA2                                                                                                                                                            |
| GO:0016814 | hydrolase activity, acting on carbon-nitrogen (but not peptide) bonds, in cyclic amidines | 3                   | 9                     | 0.0236 | folE,ribA2,ribG                                                                                                                                                        |
| GO:0032555 | purine ribonucleotide binding                                                             | 15                  | 312                   | 0.0236 | Rv1496,Rv2850c,ackA,acs,cmk,dop,engA,folE,folK,ftsZ,mpa,mtrB,pafA,pykA,ribA2                                                                                           |
| GO:0035639 | purine ribonucleoside triphosphate binding                                                | 15                  | 307                   | 0.0236 | Rv1496,Rv2850c,ackA,acs,cmk,dop,engA,folE,folK,ftsZ,mpa,mtrB,pafA,pykA,ribA2                                                                                           |
| GO:0036094 | small molecule binding                                                                    | 18                  | 497                   | 0.0245 | Rv1496,Rv2148c,Rv2850c,ackA,acs,cmk,dop,engA,folE,folK,ftsZ,mpa,mtrB,mutA,mutB,pafA,pykA,ribA2                                                                         |
| GO:0005488 | binding                                                                                   | 32                  | 1122                  | 0.0248 | Rv1496,Rv1711,Rv2148c,Rv2850c,ackA,acs,bpa,cmk,dop,engA,folE,folK,folP1,ftsZ,glmU,mpa,mtrA,mtrB,mutA,mutB,pafA,panB,prcB,pup,pykA,ribA1,ribA2,ribG,rplA,rplJ,rplM,yfiH |
| GO:0016740 | transferase activity                                                                      | 16                  | 440                   | 0.034  | Rv2851c,Rv3371,ackA,chg2,cmk,fadD21,folK,folP1,glmU,mtrB,pafA,panB,pta,pykA,ribC,ribH                                                                                  |
| GO:0031419 | cobalamin binding                                                                         | 2                   | 5                     | 0.034  | mutA,mutB                                                                                                                                                              |
| GO:0043167 | ion binding                                                                               | 25                  | 821                   | 0.034  | Rv1496,Rv2148c,Rv2850c,ackA,acs,cmk,dop,engA,folE,folK,folP1,ftsZ,glmU,mpa,mtrA,mtrB,mut                                                                               |

|            |                                                                       |    |      |        |                                                                                                                                                                                         |
|------------|-----------------------------------------------------------------------|----|------|--------|-----------------------------------------------------------------------------------------------------------------------------------------------------------------------------------------|
|            |                                                                       |    |      |        | A,mutB,pafA,panB,pykA,ribA1,ribA2,ribG,yfiH                                                                                                                                             |
| GO:0016810 | hydrolase activity, acting on carbon-nitrogen (but not peptide) bonds | 4  | 41   | 0.0382 | dop,folE,ribA2,ribG                                                                                                                                                                     |
| GO:0046872 | metal ion binding                                                     | 17 | 490  | 0.0382 | ackA,acs,dop,folE,folP1,ftsZ,glmU,mtrA,mutA,mutB,pafA,panB,pykA,ribA1,ribA2,ribG,yfiH                                                                                                   |
| GO:0016301 | kinase activity                                                       | 5  | 67   | 0.0389 | ackA,cmk,folK,mtrB,pykA                                                                                                                                                                 |
| GO:0016772 | transferase activity, transferring phosphorus-containing groups       | 7  | 127  | 0.0389 | ackA,cmk,fadD21,folK,glmU,mtrB,pykA                                                                                                                                                     |
| GO:0016866 | intramolecular transferase activity                                   | 3  | 23   | 0.0389 | Rv1711,mutA,mutB                                                                                                                                                                        |
| GO:0043168 | anion binding                                                         | 16 | 465  | 0.0389 | Rv1496,Rv2148c,Rv2850c,ackA,acs,cmk,dop,engA,folE,folK,ftsZ,mpa,mtrB,pafA,pykA,ribA2                                                                                                    |
| GO:0097159 | organic cyclic compound binding                                       | 23 | 756  | 0.0389 | Rv1496,Rv1711,Rv2148c,Rv2850c,ackA,acs,cmk,dop,engA,folE,folK,ftsZ,mpa,mtrA,mtrB,mutA,mutB,pafA,pykA,ribA2,rplA,rplJ,rplM                                                               |
| GO:1901363 | heterocyclic compound binding                                         | 23 | 756  | 0.0389 | Rv1496,Rv1711,Rv2148c,Rv2850c,ackA,acs,cmk,dop,engA,folE,folK,ftsZ,mpa,mtrA,mtrB,mutA,mutB,pafA,pykA,ribA2,rplA,rplJ,rplM                                                               |
| GO:0003824 | catalytic activity                                                    | 34 | 1310 | 0.0477 | Rv1496,Rv1543,Rv1711,Rv2850c,Rv2851c,Rv3371,ackA,acs,chg2,cmk,dop,fadD21,folB,folE,folK,folP1,ftsZ,glmU,mpa,mtrB,mutA,mutB,pafA,panB,prcA,prcB,pta,pykA,ribA1,ribA2,ribC,ribG,ribH,yfiH |

**Table S4.** Cellular Component enrichment in the PPI network of the up-regulated proteins of DR strains and other predicted functional partners.

| #term ID   | Description                  | Observed Gene Count | Background Gene Count | FDR     | Matching Proteins                                                                                                                                                                                                                    |
|------------|------------------------------|---------------------|-----------------------|---------|--------------------------------------------------------------------------------------------------------------------------------------------------------------------------------------------------------------------------------------|
| GO:0000502 | proteasome complex           | 4                   | 4                     | 0.00028 | bpa,mpa,prcA,prcB                                                                                                                                                                                                                    |
| GO:0005622 | intracellular                | 28                  | 781                   | 0.0027  | Rv1711,Rv2148c,ackA,bpa,cmk,folE,folP1,folP2,ftsZ,glmU,iniC,mpa,mtrA,mtrB,mutA,panB,prcA,prcB,pta,pykA,ribC,ribG,ribH,rplA,rplJ,rplL,rplM,sepF                                                                                       |
| GO:0044424 | intracellular part           | 27                  | 757                   | 0.0033  | Rv1711,ackA,bpa,cmk,folE,folP1,folP2,ftsZ,glmU,iniC,mpa,mtrA,mtrB,mutA,panB,prcA,prcB,pta,pykA,ribC,ribG,ribH,rplA,rplJ,rplL,rplM,sepF                                                                                               |
| GO:0044464 | cell part                    | 43                  | 1541                  | 0.0049  | Rv1417,Rv1543,Rv1711,Rv2148c,Rv2272,Rv2273,Rv3371,ackA,acs,bpa,chg2,cmk,engA,fadD21,folE,folP1,folP2,ftsZ,glmU,iniA,iniC,lpqB,lpqW,mpa,mtrA,mtrB,mutA,mutB,pafA,panB,prcA,prcB,pta,pykA,ribC,ribG,ribH,rplA,rplJ,rplL,rplM,sepF,yfiH |
| GO:0005737 | cytoplasm                    | 25                  | 729                   | 0.0066  | Rv1711,ackA,cmk,folE,folP1,folP2,ftsZ,glmU,iniC,mtrA,mtrB,mutA,panB,prcA,prcB,pta,pykA,ribC,ribG,ribH,rplA,rplJ,rplL,rplM,sepF                                                                                                       |
| GO:0005839 | proteasome core complex      | 2                   | 2                     | 0.0088  | prcA,prcB                                                                                                                                                                                                                            |
| GO:0022624 | proteasome accessory complex | 2                   | 2                     | 0.0088  | bpa,mpa                                                                                                                                                                                                                              |
| GO:0032991 | protein-containing complex   | 9                   | 184                   | 0.0297  | bpa,mpa,prcA,prcB,ribH,rplA,rplJ,rplL,rplM                                                                                                                                                                                           |
| GO:0005829 | cytosol                      | 15                  | 416                   | 0.0339  | Rv1711,cmk,folP1,folP2,iniC,mtrB,mutA,pykA,ribC,ribG,ribH,rplA,rplJ,rplL,rplM                                                                                                                                                        |
| GO:0005886 | plasma membrane              | 30                  | 1091                  | 0.0341  | Rv1417,Rv1543,Rv2272,Rv2273,Rv3371,acs,bpa,chg2,engA,fadD21,ftsZ,iniA,iniC,lpqB,mpa,mtrA,mtrB,mutA,mutB,pafA,panB,prcA,prcB,pykA,ribG,rplA,rplJ,rplL,rplM,sepF                                                                       |

|            |                                   |    |     |        |                                                                                      |
|------------|-----------------------------------|----|-----|--------|--------------------------------------------------------------------------------------|
| GO:1902494 | catalytic complex                 | 5  | 69  | 0.0341 | bpa,mpa,prcA,prcB,ribH                                                               |
| GO:0022625 | cytosolic large ribosomal subunit | 3  | 26  | 0.0417 | rplA,rplJ,rplM                                                                       |
| GO:0005618 | cell wall                         | 17 | 529 | 0.0423 | Rv1543,Rv3371,acs,bpa,chp2,engA,iniA,lpqB,mpa,muA,pafA,prcA,rplA,rplJ,rplL,rplM,yfiH |

**Table S5.** Biological Process enrichment in the PPI network of the down-regulated proteins of DR strains and other predicted functional partners.

| #term ID   | Description                                              | Observed Gene Count | Background Gene Count | FDR      | Matching Proteins                                                                                                                                                 |
|------------|----------------------------------------------------------|---------------------|-----------------------|----------|-------------------------------------------------------------------------------------------------------------------------------------------------------------------|
| GO:0044419 | interspecies interaction between organisms               | 31                  | 301                   | 6.22E-09 | PE13,PE35,PE5,PPE18,PPE68,ahpC,ahpE,ctpV,dlaT,eccCb1,eccD1,espA,espB,espC,espJ,espL,esxA,esxB,esxH,esxL,fbpB,groEL2,hbhA,hspX,katG,lppX,mpt83,mycP1,sodA,sodC,tpx |
| GO:0009405 | pathogenesis                                             | 22                  | 160                   | 2.66E-08 | PE13,PE35,PE5,PPE18,PPE68,ctpV,dlaT,eccCb1,espA,espB,espC,espJ,esxA,esxB,esxH,esxL,hbhA,katG,lppX,mycP1,sodA,tpx                                                  |
| GO:0098869 | cellular oxidant detoxification                          | 9                   | 17                    | 5.62E-07 | ahpC,ahpD,ahpE,dlaT,katG,sodA,sodC,tpx,trxB2                                                                                                                      |
| GO:0006189 | 'de novo' IMP biosynthetic process                       | 8                   | 12                    | 7.48E-07 | purE,purF,purH,purK,purL,purM,purN,purQ                                                                                                                           |
| GO:0009306 | protein secretion                                        | 8                   | 14                    | 1.09E-06 | eccCb1,espA,espB,espC,esxA,esxB,tatA,tatB                                                                                                                         |
| GO:0046040 | IMP metabolic process                                    | 8                   | 15                    | 1.37E-06 | purE,purF,purH,purK,purL,purM,purN,purQ                                                                                                                           |
| GO:0020012 | evasion or tolerance of host immune response             | 9                   | 25                    | 2.47E-06 | ahpC,ahpE,eccCb1,eccD1,espC,katG,sodA,sodC,tpx                                                                                                                    |
| GO:0044413 | avoidance of host defenses                               | 10                  | 35                    | 2.47E-06 | ahpC,ahpE,eccCb1,eccD1,espC,espL,katG,sodA,sodC,tpx                                                                                                               |
| GO:0071806 | protein transmembrane transport                          | 8                   | 17                    | 2.47E-06 | eccCb1,espA,espB,espC,esxA,esxB,tatB,tatC                                                                                                                         |
| GO:0015031 | protein transport                                        | 9                   | 29                    | 3.69E-06 | eccCb1,espA,espB,espC,esxA,esxB,tatA,tatB,tatC                                                                                                                    |
| GO:0033036 | macromolecule localization                               | 10                  | 41                    | 4.19E-06 | eccCb1,espA,espB,espC,esxA,esxB,lppX,tatA,tatB,tatC                                                                                                               |
| GO:0052572 | response to host immune response                         | 14                  | 96                    | 4.23E-06 | ahpC,ahpE,eccCb1,eccD1,espC,espL,esxA,fbpB,hspX,katG,mpt83,sodA,sodC,tpx                                                                                          |
| GO:0042592 | homeostatic process                                      | 10                  | 43                    | 5.26E-06 | ahpC,ahpD,ahpE,dlaT,eccA3,mctB,mymT,sodC,tpx,trxB2                                                                                                                |
| GO:0070887 | cellular response to chemical stimulus                   | 10                  | 43                    | 5.26E-06 | ahpC,ahpD,ahpE,dlaT,hspX,katG,sodA,sodC,tpx,trxB2                                                                                                                 |
| GO:0051701 | interaction with host                                    | 15                  | 119                   | 7.06E-06 | ahpC,ahpE,eccCb1,eccD1,espC,espL,esxA,fbpB,hbhA,hspX,katG,mpt83,sodA,sodC,tpx                                                                                     |
| GO:0044315 | protein secretion by the type VII secretion system       | 6                   | 9                     | 9.46E-06 | eccCb1,espA,espB,espC,esxA,esxB                                                                                                                                   |
| GO:0009605 | response to external stimulus                            | 16                  | 144                   | 1.24E-05 | ahpC,ahpE,eccA3,eccCb1,eccD1,espC,espL,esxA,fbpB,hspX,katG,mpt64,mpt83,sodA,sodC,tpx                                                                              |
| GO:0042221 | response to chemical                                     | 16                  | 153                   | 2.37E-05 | ahpC,ahpD,ahpE,csoR,ctpV,dlaT,fbpB,hspX,inhA,katG,mymT,rpoB,sodA,sodC,tpx,trxB2                                                                                   |
| GO:0045454 | cell redox homeostasis                                   | 7                   | 21                    | 3.33E-05 | ahpC,ahpD,ahpE,dlaT,sodC,tpx,trxB2                                                                                                                                |
| GO:0071702 | organic substance transport                              | 10                  | 56                    | 3.33E-05 | eccCb1,espA,espB,espC,esxA,esxB,lppX,tatA,tatB,tatC                                                                                                               |
| GO:0009168 | purine ribonucleoside monophosphate biosynthetic process | 9                   | 45                    | 4.54E-05 | dlaT,purE,purF,purH,purK,purL,purM,purN,purQ                                                                                                                      |
| GO:0044403 | symbiont process                                         | 17                  | 187                   | 5.68E-05 | ahpC,ahpE,eccCb1,eccD1,espC,espL,esxA,fbpB,groEL2,hbhA,hspX,katG,lppX,mpt83,sodA,sodC,tpx                                                                         |
| GO:0019725 | cellular homeostasis                                     | 8                   | 39                    | 0.00013  | ahpC,ahpD,ahpE,dlaT,eccA3,sodC,tpx,trxB2                                                                                                                          |
| GO:0009167 | purine ribonucleoside monophosphate metabolic process    | 9                   | 54                    | 0.00016  | dlaT,purE,purF,purH,purK,purL,purM,purN,purQ                                                                                                                      |



|            |                                                                           |    |     |         |                                                                                                                                                     |
|------------|---------------------------------------------------------------------------|----|-----|---------|-----------------------------------------------------------------------------------------------------------------------------------------------------|
| GO:0050896 | response to stimulus                                                      | 25 | 401 | 0.00016 | ahpC,ahpD,ahpE,csoR,ctpV,dlaT,eccA3,eccCb1,eccD1,espC,espL,esxA,fbpB,groEL2,hspX,inhA,katG,mpt64,mpt83,mymT,rpoB,sodA,sodC,tpx,trxB2                |
| GO:0052059 | evasion or tolerance by symbiont of host-produced reactive oxygen species | 4  | 4   | 0.00019 | ahpC,katG,sodA,sodC                                                                                                                                 |
| GO:0072593 | reactive oxygen species metabolic process                                 | 4  | 5   | 0.00032 | katG,sodA,sodC,trxB2                                                                                                                                |
| GO:0009152 | purine ribonucleotide biosynthetic process                                | 9  | 63  | 0.0004  | dlaT,purE,purF,purH,purK,purL,purM,purN,purQ                                                                                                        |
| GO:0065008 | regulation of biological quality                                          | 11 | 97  | 0.0004  | Rv3057c,ahpC,ahpD,ahpE,dlaT,eccA3,mctB,mymT,sodC,tpx,trxB2                                                                                          |
| GO:0010035 | response to inorganic substance                                           | 8  | 49  | 0.00045 | csoR,ctpV,hspX,katG,mymT,sodA,sodC,trxB2                                                                                                            |
| GO:0052060 | evasion or tolerance by symbiont of host-produced nitric oxide            | 4  | 6   | 0.00048 | ahpC,ahpE,sodC,tpx                                                                                                                                  |
| GO:0006810 | transport                                                                 | 13 | 158 | 0.0014  | ctpV,eccA3,eccCb1,espA,espB,espC,esxA,esxB,lppX,mctB,tatA,tatB,tatC                                                                                 |
| GO:0019430 | removal of superoxide radicals                                            | 3  | 3   | 0.0017  | sodA,sodC,trxB2                                                                                                                                     |
| GO:0040007 | growth                                                                    | 27 | 541 | 0.0019  | PPE4,Rv0525,aroF,dlaT,eccA3,eccB3,eccC3,eccCb1,eccD1,eccD3,eccE3,fbpB,groEL2,hisD,hspX,kasA,lppX,purE,purF,purH,purL,purQ,rpoB,tatA,tatB,tatC,trxB2 |
| GO:0034614 | cellular response to reactive oxygen species                              | 4  | 11  | 0.0022  | katG,sodA,sodC,trxB2                                                                                                                                |
| GO:0009150 | purine ribonucleotide metabolic process                                   | 9  | 85  | 0.0024  | dlaT,purE,purF,purH,purK,purL,purM,purN,purQ                                                                                                        |
| GO:0051716 | cellular response to stimulus                                             | 12 | 167 | 0.0063  | ahpC,ahpD,ahpE,dlaT,eccA3,hspX,katG,mpt64,sodA,sodC,tpx,trxB2                                                                                       |
| GO:0051409 | response to nitrosative stress                                            | 4  | 16  | 0.0064  | ahpC,ahpE,hspX,tpx                                                                                                                                  |
| GO:0055085 | transmembrane transport                                                   | 10 | 123 | 0.0068  | ctpV,eccCb1,espA,espB,espC,esxA,esxB,mctB,tatB,tatC                                                                                                 |
| GO:0046688 | response to copper ion                                                    | 3  | 7   | 0.0076  | csoR,ctpV,mymT                                                                                                                                      |
| GO:0010038 | response to metal ion                                                     | 4  | 19  | 0.0103  | csoR,ctpV,hspX,mymT                                                                                                                                 |
| GO:0006979 | response to oxidative stress                                              | 6  | 50  | 0.0107  | ahpD,katG,sodA,sodC,tpx,trxB2                                                                                                                       |
| GO:0043953 | protein transport by the Tat complex                                      | 2  | 2   | 0.0169  | tatB,tatC                                                                                                                                           |
| GO:0055070 | copper ion homeostasis                                                    | 2  | 2   | 0.0169  | mctB,mymT                                                                                                                                           |
| GO:0006950 | response to stress                                                        | 12 | 197 | 0.0206  | ahpC,ahpD,ahpE,eccA3,groEL2,hspX,katG,mpt64,sodA,sodC,tpx,trxB2                                                                                     |
| GO:0065007 | biological regulation                                                     | 19 | 398 | 0.0224  | Rv3057c,ahpC,ahpD,ahpE,csoR,dlaT,eccA3,espL,fbpB,groEL2,hbhA,hspX,katG,mctB,mycP1,mymT,sodC,tpx,trxB2                                               |
| GO:0042783 | active evasion of host immune response                                    | 3  | 14  | 0.0349  | eccCb1,eccD1,espC                                                                                                                                   |
| GO:0055076 | transition metal ion homeostasis                                          | 3  | 16  | 0.0463  | eccA3,mctB,mymT                                                                                                                                     |

**Table S6.** Molecular Function enrichment in the PPI network of the down-regulated proteins of DR strains and other predicted functional partners.

| #term ID   | Description            | Observed Gene Count | Background Gene Count | FDR      | Matching Proteins                            |
|------------|------------------------|---------------------|-----------------------|----------|----------------------------------------------|
| GO:0016209 | antioxidant activity   | 9                   | 17                    | 8.88E-07 | ahpC,ahpD,ahpE,dlaT,katG,sodA,sodC,tpx,trxB2 |
| GO:0004601 | peroxidase activity    | 5                   | 9                     | 0.0013   | ahpC,ahpD,ahpE,katG,tpx                      |
| GO:0051920 | peroxiredoxin activity | 4                   | 6                     | 0.003    | ahpC,ahpD,ahpE,tpx                           |

|            |                                                                                 |   |    |        |                               |
|------------|---------------------------------------------------------------------------------|---|----|--------|-------------------------------|
| GO:0016667 | oxidoreductase activity, acting on a sulfur group of donors                     | 5 | 19 | 0.0075 | ahpC,ahpD,dlaT,tpx,trxB2      |
| GO:0051287 | NAD binding                                                                     | 6 | 30 | 0.0075 | aroF,hisD,inhA,katG,mmsA,mmsB |
| GO:0015036 | disulfide oxidoreductase activity                                               | 4 | 12 | 0.0134 | ahpD,dlaT,tpx,trxB2           |
| GO:0016668 | oxidoreductase activity, acting on a sulfur group of donors, NAD(P) as acceptor | 3 | 8  | 0.0492 | ahpC,dlaT,trxB2               |

**Table S7.** Cellular Component enrichment in the PPI network of the down-regulated proteins of DR strains and other predicted functional partners.

| #term ID   | Description                      | Observed Gene Count | Background Gene Count | FDR      | Matching Proteins                                                                                                                                                                                                                                                                                                                                                        |
|------------|----------------------------------|---------------------|-----------------------|----------|--------------------------------------------------------------------------------------------------------------------------------------------------------------------------------------------------------------------------------------------------------------------------------------------------------------------------------------------------------------------------|
| GO:0005576 | extracellular region             | 30                  | 287                   | 1.77E-09 | PE13,PE35,PE5,PPE18,PPE68,cfp21,eccB3,espA,espB,espC,espJ,esxA,esxB,esxH,esxK,esxL,esxN,esxR,fbpB,groEL2,hspX,katG,lppX,mpt63,mpt64,mpt70,mpt83,sodA,sodC,tpx                                                                                                                                                                                                            |
| GO:0030312 | external encapsulating structure | 37                  | 532                   | 1.44E-07 | PE13,PPE18,PPE68,Rv0968,ahpC,cfp21,ctpV,dlaT,eccA3,eccB3,eccC3,eccCb1,eccD1,eccD3,eccE3,espC,espL,esxA,esxB,esxL,fbpB,groEL2,hbhA,hisD,hspX,inhA,kasA,katG,lppX,mctB,mpt63,mpt64,mpt83,rpoB,sodC,sseA,tpx                                                                                                                                                                |
| GO:0005618 | cell wall                        | 36                  | 529                   | 3.04E-07 | PE13,PPE18,PPE68,Rv0968,ahpC,cfp21,ctpV,dlaT,eccA3,eccB3,eccC3,eccCb1,eccD1,eccD3,eccE3,espC,espL,esxA,esxB,esxL,fbpB,groEL2,hbhA,hisD,hspX,inhA,kasA,katG,lppX,mpt63,mpt64,mpt83,rpoB,sodC,sseA,tpx                                                                                                                                                                     |
| GO:0044464 | cell part                        | 66                  | 1541                  | 6.00E-07 | PE13,PE35,PE5,PPE18,PPE36,PPE4,PPE68,Rv0525,Rv0968,Rv0970,Rv2204c,Rv3057c,ahpC,ahpD,ahpE,aroF,cfp21,csoR,ctpV,dlaT,eccA3,eccB3,eccC3,eccCb1,eccD1,eccD3,eccE3,espA,espC,espK,espL,esxA,esxB,esxL,esxN,fbpB,groEL2,hbhA,hisD,hspX,inhA,kasA,katG,lppX,mctB,mmsA,mpt63,mpt64,mpt70,mpt83,mycP1,purH,purK,purL,purM,purQ,rpmB1,rpoB,sodA,sodC,sseA,tatA,tatB,tatC,tpx,trxB2 |
| GO:0071944 | cell periphery                   | 55                  | 1224                  | 5.72E-06 | PE13,PPE18,PPE36,PPE4,PPE68,Rv0525,Rv0968,Rv0970,Rv2204c,ahpC,ahpD,cfp21,csoR,ctpV,dlaT,eccA3,eccB3,eccC3,eccCb1,eccD1,eccD3,eccE3,espA,espC,espK,espL,esxA,esxB,esxL,esxN,fbpB,groEL2,hbhA,hisD,hspX,inhA,kasA,katG,lppX,mctB,mpt63,mpt64,mpt83,mycP1,purH,purK,purQ,rpoB,sodA,sodC,sseA,tatA,tatB,tatC,tpx                                                             |
| GO:0005615 | extracellular space              | 5                   | 8                     | 0.0001   | espA,mpt63,mpt70,mpt83,sodC                                                                                                                                                                                                                                                                                                                                              |
| GO:0005886 | plasma membrane                  | 46                  | 1091                  | 0.00043  | PPE36,PPE4,PPE68,Rv0525,Rv0968,Rv0970,Rv2204c,ahpC,ahpD,csoR,ctpV,dlaT,eccA3,eccB3,eccC3,eccCb1,eccD1,eccD3,eccE3,espA,espK,espL,esxA,esxB,esxL,esxN,fbpB,groEL2,hbhA,hspX,inhA,kasA,katG,lppX,mpt83,mycP1,purH,purK,purQ,rpoB,sodA,sodC,sseA,tatA,tatB,tatC                                                                                                             |
| GO:0009986 | cell surface                     | 7                   | 34                    | 0.00043  | PE35,PE5,PPE18,PPE68,hbhA,lppX,mycP1                                                                                                                                                                                                                                                                                                                                     |
| GO:0016020 | membrane                         | 47                  | 1122                  | 0.00043  | PPE36,PPE4,PPE68,Rv0525,Rv0968,Rv0970,Rv2204c,ahpC,ahpD,csoR,ctpV,dlaT,eccA3,eccB3,eccC3,eccCb1,eccD1,eccD3,eccE3,espA,espK,espL,esxA,esxB,esxL,esxN,fbpB,groEL2,hbhA,hspX,inhA,kasA,katG,lppX,mctB,mpt83,mycP1,purH,purK,purQ,rpoB,sodA,sodC,sseA,tatA,tatB,tatC                                                                                                        |
| GO:0005829 | cytosol                          | 24                  | 416                   | 0.00062  | Rv2204c,Rv3057c,ahpC,ahpD,ahpE,aroF,dlaT,eccA3,espK,groEL2,hbhA,hisD,hspX,kasA,katG,purK,purM,rpmB1,rpoB,sodA,sseA,tatC,tpx,trxB2                                                                                                                                                                                                                                        |
| GO:0044444 | cytoplasmic part                 | 25                  | 483                   | 0.0021   | Rv2204c,Rv3057c,ahpC,ahpD,ahpE,aroF,dlaT,eccA3,espK,groEL2,hbhA,hisD,hspX,kasA,katG,mm                                                                                                                                                                                                                                                                                   |

|            |                                 |    |     |        |                                                                                                                                                                       |
|------------|---------------------------------|----|-----|--------|-----------------------------------------------------------------------------------------------------------------------------------------------------------------------|
|            |                                 |    |     |        | sA,purK,purM,rpmB1,rpoB,sodA,sseA,tatC,tpx,trxB2                                                                                                                      |
| GO:0031975 | envelope                        | 5  | 32  | 0.0108 | PE5,groEL2,mctB,mpt70,mpt83                                                                                                                                           |
| GO:0030313 | cell envelope                   | 4  | 19  | 0.0114 | groEL2,mctB,mpt70,mpt83                                                                                                                                               |
| GO:0005737 | cytoplasm                       | 30 | 729 | 0.0158 | Rv2204c,Rv3057c,ahpC,ahpD,ahpE,aroF,csoR,dlaT,eccA3,eccCb1,espK,esxA,groEL2,hbhA,hisD,hs<br>pX,kasA,katG,mmsA,purK,purL,purM,purQ,rpmB1,rpoB,sodA,sseA,tatC,tpx,trxB2 |
| GO:0044165 | host cell endoplasmic reticulum | 2  | 2   | 0.0169 | esxA,esxB                                                                                                                                                             |
| GO:0044228 | host cell surface               | 2  | 3   | 0.0248 | esxA,esxB                                                                                                                                                             |
| GO:0042597 | periplasmic space               | 3  | 15  | 0.035  | mpt70,mpt83,sodA                                                                                                                                                      |

**Table S8.** Biological Process enrichment in the PPI network of the specific expressed proteins of DR strains and other predicted functional partners.

| #term ID   | Description                                       | Observed Gene<br>Count | Background<br>Gene Count | FDR      | Matching Proteins                                                      |
|------------|---------------------------------------------------|------------------------|--------------------------|----------|------------------------------------------------------------------------|
| GO:0009108 | coenzyme biosynthetic process                     | 11                     | 88                       | 1.99E-05 | moaA1,moaA2,moaC1,moaC3,moeB2,nadA,nadB,nadC,nadD,nadE,pfkB            |
| GO:0009435 | NAD biosynthetic process                          | 5                      | 7                        | 4.57E-05 | nadA,nadB,nadC,nadD,nadE                                               |
| GO:0019674 | NAD metabolic process                             | 5                      | 9                        | 5.65E-05 | nadA,nadB,nadC,nadD,nadE                                               |
| GO:0019359 | nicotinamide nucleotide biosynthetic process      | 6                      | 22                       | 9.42E-05 | nadA,nadB,nadC,nadD,nadE,pfkB                                          |
| GO:0006777 | Mo-molybdopterin cofactor biosynthetic process    | 5                      | 13                       | 0.00012  | moaA1,moaA2,moaC1,moaC3,moeB2                                          |
| GO:0019720 | Mo-molybdopterin cofactor metabolic process       | 5                      | 13                       | 0.00012  | moaA1,moaA2,moaC1,moaC3,moeB2                                          |
| GO:0046496 | nicotinamide nucleotide metabolic process         | 6                      | 30                       | 0.00017  | nadA,nadB,nadC,nadD,nadE,pfkB                                          |
| GO:0090407 | organophosphate biosynthetic process              | 11                     | 159                      | 0.00027  | moaA1,moaA2,moaC1,moaC3,moeB2,nadA,nadB,nadC,nadD,nadE,pfkB            |
| GO:0019637 | organophosphate metabolic process                 | 11                     | 205                      | 0.0022   | moaA1,moaA2,moaC1,moaC3,moeB2,nadA,nadB,nadC,nadD,nadE,pfkB            |
| GO:0006531 | aspartate metabolic process                       | 2                      | 2                        | 0.0158   | nadA,nadD                                                              |
| GO:0006796 | phosphate-containing compound metabolic process   | 11                     | 269                      | 0.0158   | moaA1,moaA2,moaC1,moaC3,moeB2,nadA,nadB,nadC,nadD,nadE,pfkB            |
| GO:0034628 | 'de novo' NAD biosynthetic process from aspartate | 2                      | 2                        | 0.0158   | nadA,nadD                                                              |
| GO:0046874 | quinolinate metabolic process                     | 2                      | 2                        | 0.0158   | nadA,nadC                                                              |
| GO:0018130 | heterocycle biosynthetic process                  | 12                     | 355                      | 0.0376   | mce2R,moaA1,moaA2,moaC1,moaC3,moeB2,nadA,nadB,nadC,nadD,nadE,pfkB      |
| GO:1901566 | organonitrogen compound biosynthetic process      | 13                     | 401                      | 0.0376   | cysO,moaA1,moaA2,moaC1,moaC3,moeB1,moeB2,nadA,nadB,nadC,nadD,nadE,pfkB |

**Table S9.** Cellular Component enrichment in the PPI network of the specific expressed proteins of DR strains and other predicted functional partners.

| #term ID   | Description                    | Observed Gene<br>Count | Background<br>Gene Count | FDR    | Matching Proteins |
|------------|--------------------------------|------------------------|--------------------------|--------|-------------------|
| GO:0019008 | molybdopterin synthase complex | 2                      | 2                        | 0.0237 | moaA1,moaA2       |

**Table S10.** Biological Process enrichment in the PPI network of the unexpressed proteins of DR strains and other predicted functional partners.

| #term ID   | Description                                     | Observed Gene Count | Background Gene Count | FDR     | Matching Proteins                                                                                                                     |
|------------|-------------------------------------------------|---------------------|-----------------------|---------|---------------------------------------------------------------------------------------------------------------------------------------|
| GO:0071770 | DIM/DIP cell wall layer assembly                | 11                  | 19                    | 0.00024 | Rv2953,Rv2959c,drdB,fadD26,papA5,pks1,ppsA,ppsB,ppsC,ppsD,ppsE                                                                        |
| GO:0018958 | phenol-containing compound metabolic process    | 8                   | 14                    | 0.0052  | ideR,mbtB,mbtG,mbtI,ppsA,ppsB,ppsC,ppsD                                                                                               |
| GO:0034660 | ncRNA metabolic process                         | 16                  | 68                    | 0.0052  | dtd,fmt,gltS,ksgA,pheT,rimM,rlmN,rnc,rsmE,rsmI,trmB,trmD,trlI,trpS,truA,ybeY                                                          |
| GO:0071766 | Actinobacterium-type cell wall biogenesis       | 13                  | 49                    | 0.0057  | Rv2953,Rv2959c,drdB,fadD23,fadD26,mmpL3,papA5,pks1,ppsA,ppsB,ppsC,ppsD,ppsE                                                           |
| GO:0034470 | ncRNA processing                                | 12                  | 43                    | 0.006   | fmt,ksgA,rimM,rlmN,rnc,rsmE,rsmI,trmB,trmD,trlI,truA,ybeY                                                                             |
| GO:0001510 | RNA methylation                                 | 7                   | 14                    | 0.0104  | ksgA,rlmN,rsmE,rsmI,trmB,trmD,trlI                                                                                                    |
| GO:0044085 | cellular component biogenesis                   | 22                  | 139                   | 0.0104  | Rv1433,Rv2953,Rv2959c,drdB,engA,fadD23,fadD26,ksgA,mmpL3,papA5,pks1,ppsA,ppsB,ppsC,ppsD,ppsE,rimM,rlmN,rnc,rsmE,rsmI,ybeY             |
| GO:0009451 | RNA modification                                | 9                   | 30                    | 0.019   | fmt,ksgA,rlmN,rsmE,rsmI,trmB,trmD,trlI,truA                                                                                           |
| GO:0006364 | rRNA processing                                 | 7                   | 21                    | 0.0194  | ksgA,rimM,rlmN,rnc,rsmE,rsmI,ybeY                                                                                                     |
| GO:0006399 | tRNA metabolic process                          | 11                  | 47                    | 0.0194  | dtd,fmt,gltS,pheT,rlmN,rnc,trlI,trpS,truA                                                                                             |
| GO:0006633 | fatty acid biosynthetic process                 | 13                  | 64                    | 0.0194  | fadD23,fadD26,mbtB,pks1,pks2,pks4,pks5,ppsA,ppsB,ppsC,ppsD,ppsE,ufaA1                                                                 |
| GO:0008610 | lipid biosynthetic process                      | 22                  | 155                   | 0.0194  | Rv2953,Rv2957,Rv2958c,Rv2959c,Rv2962c,drdB,fadD23,fadD26,mbtB,mmpL8,papA1,papA5,pks1,pks2,pks4,pks5,ppsA,ppsB,ppsC,ppsD,ppsE,ufaA1    |
| GO:0009273 | peptidoglycan-based cell wall biogenesis        | 14                  | 74                    | 0.0194  | Rv1433,Rv2953,Rv2959c,drdB,fadD23,fadD26,mmpL3,papA5,pks1,ppsA,ppsB,ppsC,ppsD,ppsE                                                    |
| GO:0030488 | tRNA methylation                                | 4                   | 4                     | 0.0194  | rlmN,trlI,trmB,trlI                                                                                                                   |
| GO:0032259 | methylation                                     | 13                  | 65                    | 0.0194  | Rv0145,Rv0146,Rv0560c,Rv1405c,Rv2959c,ksgA,rlmN,rsmE,rsmI,trlI,truA                                                                   |
| GO:0042844 | glycol metabolic process                        | 5                   | 7                     | 0.0194  | fadD26,ppsA,ppsB,ppsC,ppsD                                                                                                            |
| GO:0044550 | secondary metabolite biosynthetic process       | 6                   | 14                    | 0.0194  | cysD,cysN,ideR,mbtB,mbtG,mbtI                                                                                                         |
| GO:0046189 | phenol-containing compound biosynthetic process | 5                   | 7                     | 0.0194  | mbtI,ppsA,ppsB,ppsC,ppsD                                                                                                              |
| GO:0071554 | cell wall organization or biogenesis            | 16                  | 95                    | 0.0194  | Rv1433,Rv2953,Rv2959c,drdB,fadD23,fadD26,mmpL3,mmpL8,papA5,pks1,ppsA,ppsB,ppsC,ppsD,ppsE,ufaA1                                        |
| GO:0071840 | cellular component organization or biogenesis   | 24                  | 182                   | 0.0194  | Rv1433,Rv2953,Rv2959c,drdB,engA,fadD23,fadD26,ksgA,mmpL3,mmpL8,papA5,pks1,ppsA,ppsB,ppsC,ppsD,ppsE,rimM,rlmN,rnc,rsmE,rsmI,ufoA1,ybeY |
| GO:0072330 | monocarboxylic acid biosynthetic process        | 16                  | 92                    | 0.0194  | bioD,dlaT,fadD23,fadD26,mbtB,mbtI,pks1,pks2,pks4,pks5,ppsA,ppsB,ppsC,ppsD,ppsE,ufoA1                                                  |
| GO:0097040 | phthiocerol biosynthetic process                | 5                   | 7                     | 0.0194  | fadD26,ppsA,ppsB,ppsC,ppsD                                                                                                            |
| GO:1901264 | carbohydrate derivative transport               | 4                   | 4                     | 0.0194  | drdB,drdB,mmpL3                                                                                                                       |
| GO:0006400 | tRNA modification                               | 6                   | 17                    | 0.0321  | fmt,rlmN,trlI,truA                                                                                                                    |
| GO:0097041 | phenolic phthiocerol biosynthetic process       | 4                   | 6                     | 0.0321  | ppsA,ppsB,ppsC,ppsD                                                                                                                   |
| GO:0008033 | tRNA processing                                 | 7                   | 25                    | 0.0341  | fmt,rlmN,rnc,trlI,truA                                                                                                                |
| GO:0042254 | ribosome biogenesis                             | 8                   | 33                    | 0.0346  | engA,ksgA,rimM,rlmN,rnc,rsmE,rsmI,ybeY                                                                                                |
| GO:0010106 | cellular response to iron ion starvation        | 5                   | 12                    | 0.0355  | Rv0560c,irtA,mbtB,mbtI,pks2                                                                                                           |

|            |                                                |    |     |        |                                                                                                                                                 |
|------------|------------------------------------------------|----|-----|--------|-------------------------------------------------------------------------------------------------------------------------------------------------|
| GO:0009712 | catechol-containing compound metabolic process | 4  | 7   | 0.0407 | ideR,mbtB,mbtG,mbtI                                                                                                                             |
| GO:0019540 | siderophore biosynthetic process from catechol | 4  | 7   | 0.0407 | ideR,mbtB,mbtG,mbtI                                                                                                                             |
| GO:0042891 | antibiotic transport                           | 4  | 7   | 0.0407 | Rv1634,drrA,drrB,drrC                                                                                                                           |
| GO:1901617 | organic hydroxy compound biosynthetic process  | 7  | 28  | 0.0453 | fadD26,mbtI,ppsA,ppsB,ppsC,ppsD,snoP                                                                                                            |
| GO:0043215 | daunorubicin transport                         | 3  | 3   | 0.0455 | drrA,drrB,drrC                                                                                                                                  |
| GO:1900753 | doxorubicin transport                          | 3  | 3   | 0.0455 | drrA,drrB,drrC                                                                                                                                  |
| GO:0010467 | gene expression                                | 29 | 274 | 0.0468 | fmt,gltS,ideR,ksgA,lepA,mmpR5,mtrA,pheT,prfA,rimM,rlmN,rnc,rplS,rplU,rpmA,rpsP,rsbW,rsmE,rsmI,sigH,sigL,sigL,sigM,trmB,trmD,trlI,trlS,truA,ybeY |

**Table S11.** Cellular Component enrichment in the PPI network of the unexpressed proteins of DR strains and other predicted functional partners.

| #term ID   | Description                 | Observed Gene Count | Background Gene Count | FDR    | Matching Proteins                                                                                                                |
|------------|-----------------------------|---------------------|-----------------------|--------|----------------------------------------------------------------------------------------------------------------------------------|
| GO:0032991 | protein-containing complex  | 26                  | 184                   | 0.0085 | accD5,atpH,carA,cysD,cysN,dlaT,drrB,drrC,mbtI,obg,pheT,pks4,ppsA,ppsB,ppsC,ppsD,ppsE,rimM,rplS,rplU,rpmA,rpsP,snoP,tmB,trlI,xseB |
| GO:0034081 | polyketide synthase complex | 6                   | 10                    | 0.0085 | pks4,ppsA,ppsB,ppsC,ppsD,ppsE                                                                                                    |
| GO:1902494 | catalytic complex           | 13                  | 69                    | 0.0145 | accD5,carA,cysD,cysN,dlaT,drrB,drrC,mbtI,pheT,snoP,tmB,trlI,xseB                                                                 |
